# Supplementary material for: The synaptonemal complex imposes crossover interference and heterochiasmy in Arabidopsis
Source: PubMed Central journal article supplement — Proc Natl Acad Sci U S A. 2021 Mar 15;118(12):e2023613118. doi: 10.1073/pnas.2023613118 (PMC8000504; doi:10.1073/pnas.2023613118), 2021-03-15
Supplement: pnas.2023613118.sapp.pdf [file pnas.2023613118.sapp.pdf]

## Supplementary Information for

The synaptonemal complex imposes crossover interference and heterochiasmy in Arabidopsis

Laia Capilla-Perez, Stéphanie Durand, Aurélie Hurel, Qichao Lian, Aurélie Chambon, Christelle Tauchy, Victor Solier, Mathilde Grelon, Raphael Mercier\*

Raphael Mercier  
Email: mercier@mpipz.mpg.de

### This PDF file includes:

Figure S1. Meiotic chromosome spreads in *smo2*.  
Figure S2. Fitting of MLH1 foci distribution to a Poisson distribution  
Figure S3. Fitting of the CO number distribution to a Poisson distribution

### Other supplementary materials for this manuscript include the following:

Video S1. Z stack of figure 1A  
Video S2. Z stack of figure 1B  
Video S3. Z stack of figure 2B  
Video S4. Z stack of figure 2B  
Video S5. Z stack of figure 5A  
Video S6. Z stack of figure 5B  
Dataset S1. Primers and clones used in this study  
Dataset S2. COs position in wild type and *zyp1* mutant

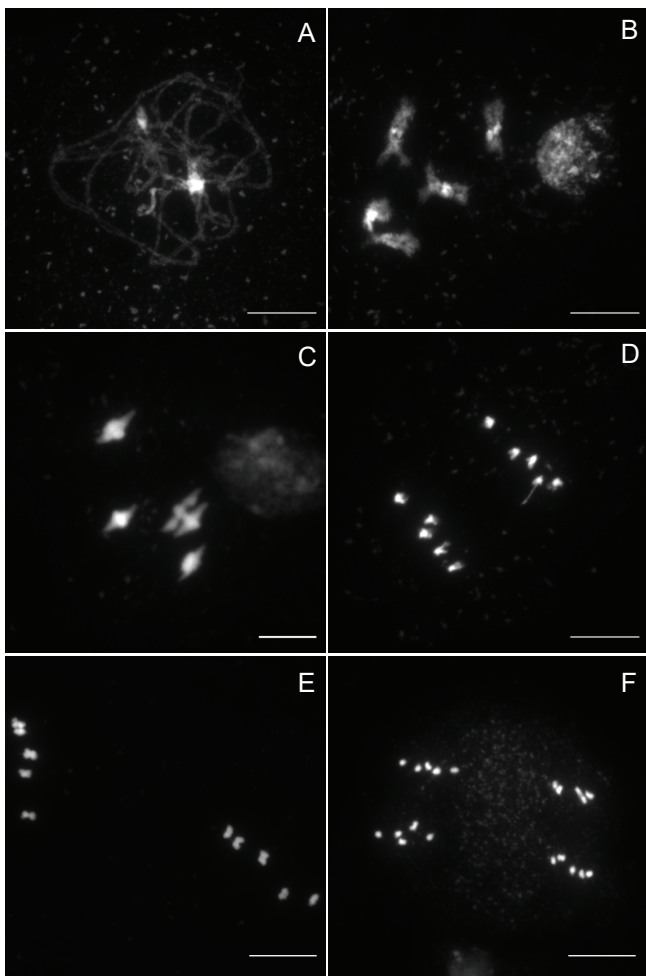

Figure S1. Meiotic chromosome spreads in *smo2*.

(A) Pachytene. (B) Diakinesis. (C) Metaphase I with 5 bivalents.

(D) Anaphase I. (E) Metaphase II. (F) Anaphase II. Scale bar=10 $\mu$ m.

Wild type (n=34)

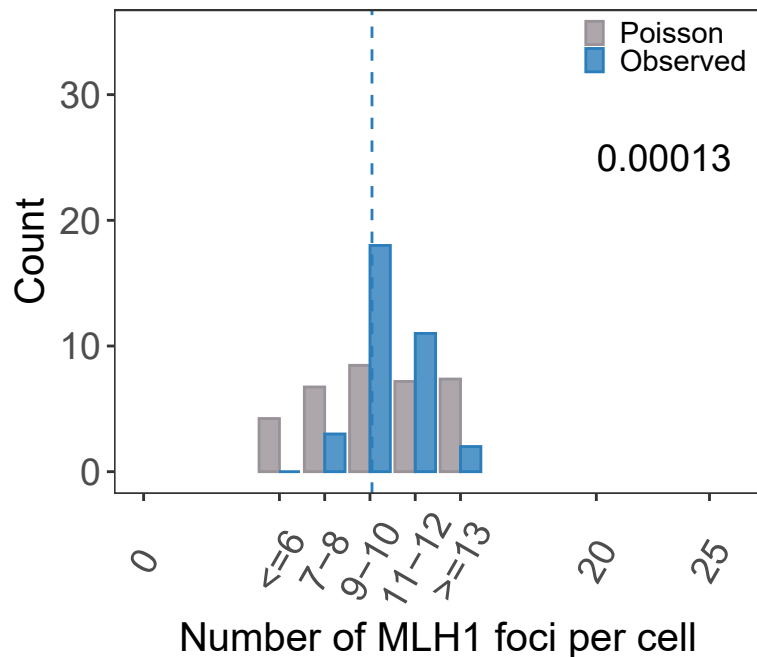

*zyp1* (n=212)

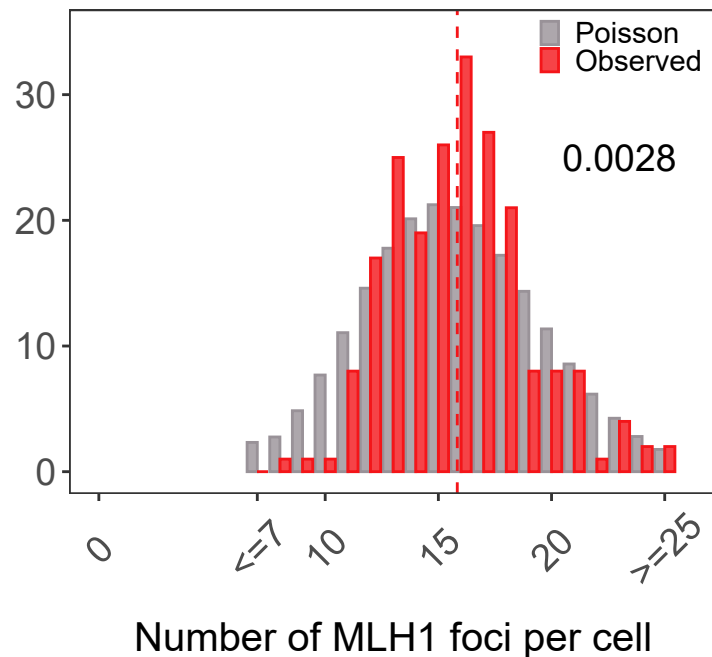

Figure S2. Fitting of MLH1 foci distribution to a Poisson distribution. Classes were pooled to ensure the validity of the chi-squared tests.

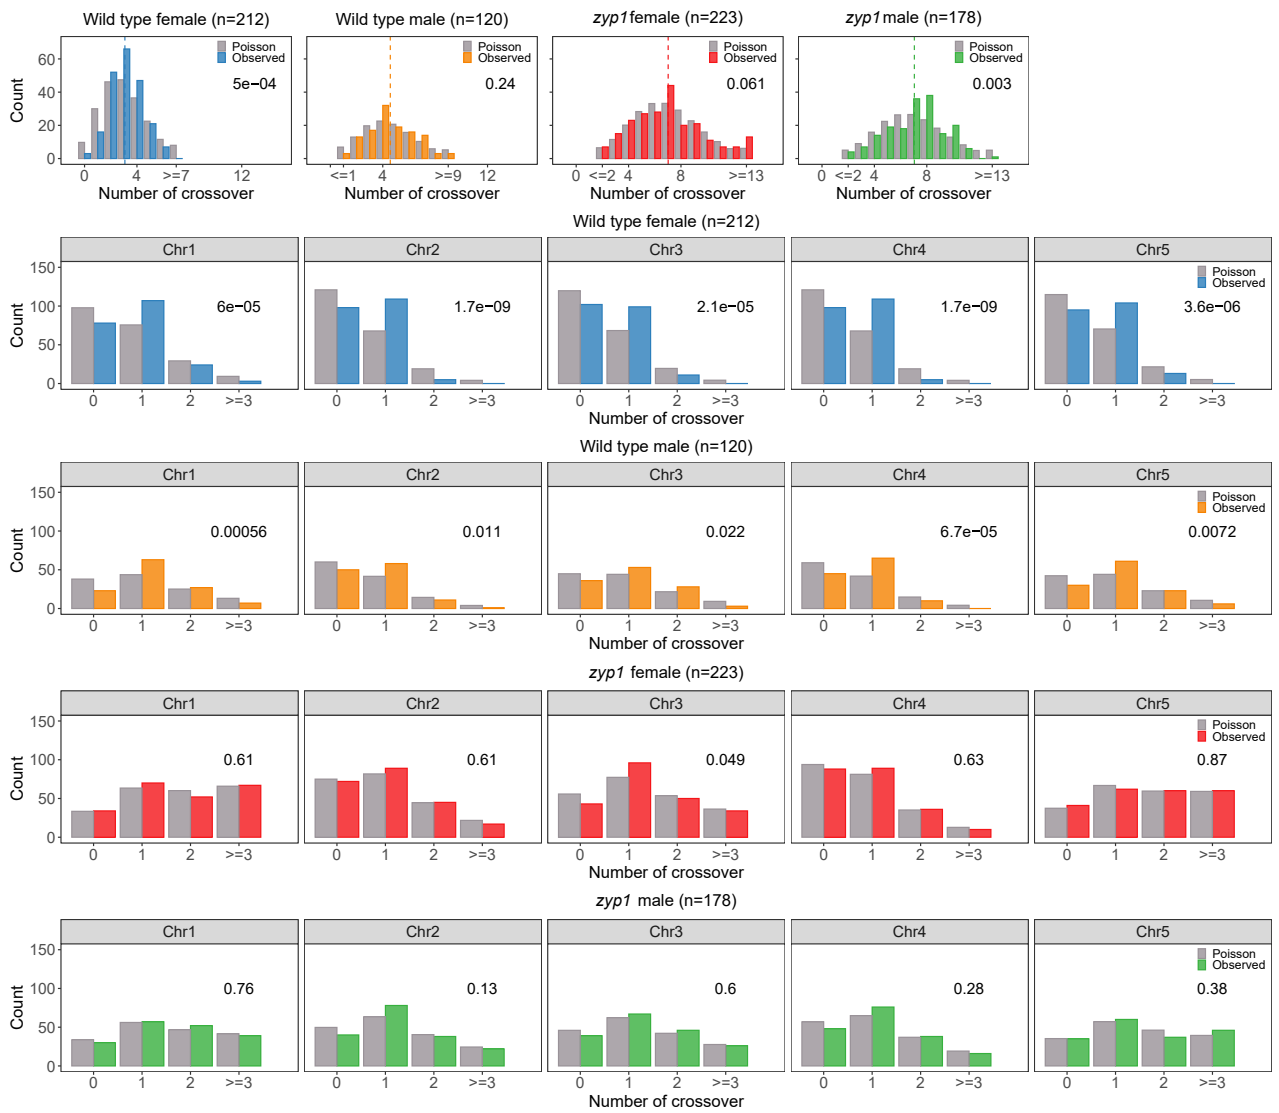

Figure S3. Fitting of the CO number distribution to a Poisson distribution  
Classes were pooled to ensure the validity of the Chi-square tests.
